# Supplementary material for: A new cathode material synthesized by a thiol-modified metal–organic framework (MOF) covalently connecting sulfur for superior long-cycling stability in lithium–sulfur batteries
Source: Royal Society of Chemistry journal article supplement (doi:10.1039/c9ta08043k), 2019-01-01
Supplement: c9ta08043k1.pdf [file c9ta08043k1.pdf]

**A New Cathode Material Synthesized by Thiol-modificatory Metal-organic Framework (MOF) Covalently Connecting Sulfur for Superior Long-cycling Stability Lithium-sulfur Batteries**

Xu Liu<sup>a</sup>, Shi Wang<sup>a,b</sup>, Ailian Wang<sup>c</sup>, Zhinan Wang<sup>a</sup>, Jie Chen<sup>a</sup>, Qinghui Zeng<sup>a</sup>,  
Pingping Chen<sup>a</sup>, Wei Liu<sup>\*a</sup>, Zengxi Li<sup>a\*</sup> and Liaoyun Zhang<sup>a\*</sup>

a. School of Chemical Sciences, University of Chinese Academy of Sciences, Beijing 100049, China.

b. Key Laboratory for Organic Electronics & Information Displays (KLOEID) & Institute of Advanced Materials (IAM), Jiangsu National Synergetic Innovation Center for Advanced Materials (SICAM), Nanjing University of Posts & Telecommunications, Nanjing 210023, China.

c. Sionpec Beijing Research Institute of Chemical Industry, Beijing 100013, China.

Email: zhangly@ucas.edu.cn; lizengxi@ucas.edu.cn; weiliu@ucas.edu.cn

## **Experimental Section**

### **Materials**

The CNTs (2-10 nm, purity > 95%) were purchased from Shanghai Aladdin Reagent Co., Ltd. (China). N,N-dimethylformamide (DMF; AR), concentrated sulfuric acid [H<sub>2</sub>SO<sub>4</sub>; 98%, chemical pure (CP)], hydrochloric acid (HCl; 36%, CP), nitric acid (65-68%) and absolute ethyl alcohol were supplied by Beijing Chemical Works (China) and used as received directly. Zirconium chloride (98%, Aladdin), 2-aminoterephthalic acid (99%, Aldrich), Dicyclohexylcarbodiimide (DCC, 99%, Aladdin) and thioglycolic acid (TGA, 99%, Aladdin) were used directly without other processing.

### **Synthesis of CNT@UiO66-NH<sub>2</sub>.**

The CNTs were first treated by H<sub>2</sub>SO<sub>4</sub> and HNO<sub>3</sub> (volume ratio 3:1) at 60 °C for 2 h to produce acidification of carbon nanotubes (CNT-COOH). For the preparation of Nanosized CNT@UiO66-NH<sub>2</sub> particles, 200 mg of CNT-COOH was first dispersed in 65 mL of DMF under sonication for 0.5 h; then, ZrCl<sub>4</sub> (predissolved in a HCl/DMF mixture with v(HCl) : v(DMF) 1 : 5) and 2-amino-4,4'-dicarboxylic acid (predissolved in DMF) at a molar ratio of 1 : 1.4 were mixed and heated at 80 °C overnight. The obtained sample was segregated by centrifugation. DMF and absolute ethyl alcohol were successively used to wash the sample 3 times. Finally, the product was dried at 100 °C for 24 h in a vacuum.

### **Synthesis of CNT@UiO66-SH**

CNT@UiO66-NH<sub>2</sub> (0.5 g) and DCC (0.5 g) were added to a round bottom flask

containing 10 ml of DMF. To obtain a homogeneous mixture, the mixture was mixed for 3 min through sonication. TGA (0.6 ml) was added dropwise to the mixture and stirred at 25 °C for 24 h. The obtained product was isolated through centrifugation. Deionized water and absolute ethyl alcohol were successively used to wash the sample 3 times. Finally, the product was dried at 40 °C for 24 h in a vacuum oven.

#### **Shuttle currents tests:**

Shuttle current tests were performed based on the Narayanan method. In brief, CNT@UIO66-S and CNT@UIO66-NH<sub>2</sub>/S electrodes were prepared with the aforementioned methods. However, the electrolyte was changed to LiNO<sub>3</sub>-free electrolyte, aiming to prevent the passivation of lithium anode with LiNO<sub>3</sub>. For the measurement of shuttle currents, the cells were firstly charged and discharged three times at C/20 rate. Following this, the voltage of the cells was charged to 2.7 V and the cells stayed with an open-circuit state for 10 minutes. Then, the cells were switched to a potentiostatic mode to offset the drop voltage at different stages (2.70, 2.60, 2.5, 2.4, 2.35, 2.3, and 2.25 V) for 2 hour before reaching a steady-state value. The steady-state current was the shuttle current because the voltage would continue to drop if there was no external current to compromise the shuttle effect.

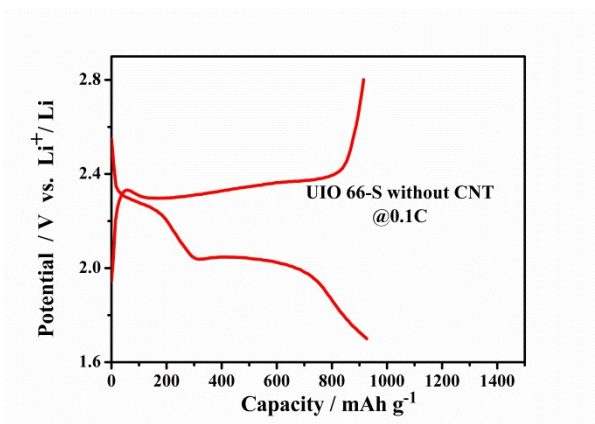

**Figure S1** The charge/discharge curve for UIO66-S/Li coin cell, Current density: 0.1C; cut off voltages: 1.7–2.8 V.

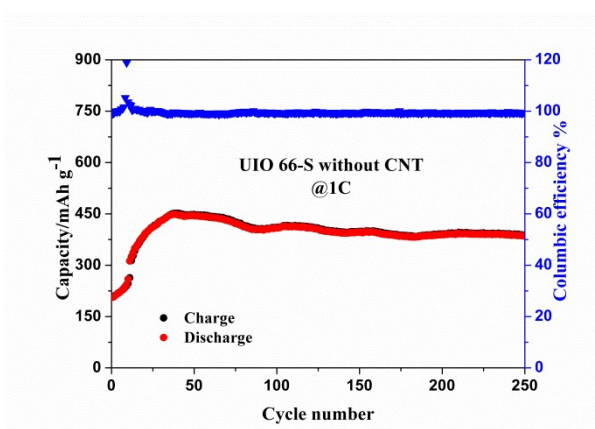

**Figure S2** Cycling performance of the UIO66-S/Li coin cells at 1C

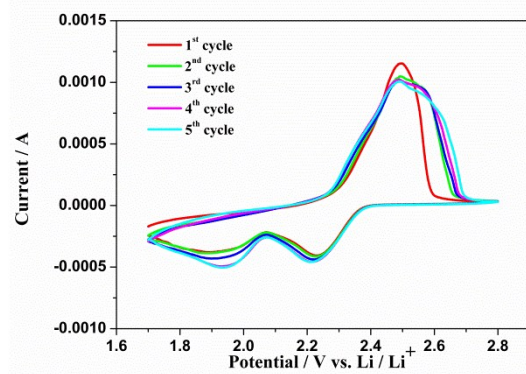

**Figure S3.** CV curves of CNT@UIO66-NH<sub>2</sub>/S electrode

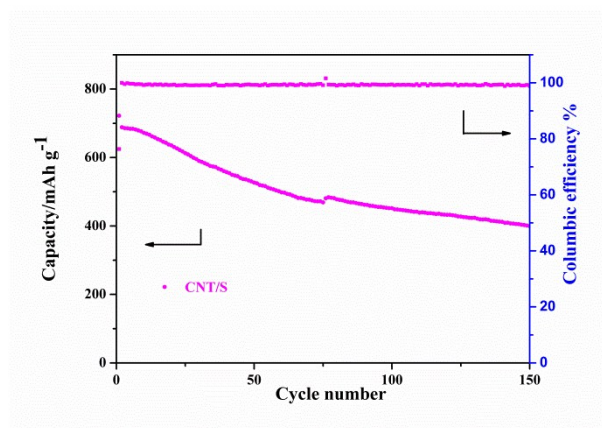

**Figure S4** Cycling performance of the CNT/S/Li coin cells at 1C

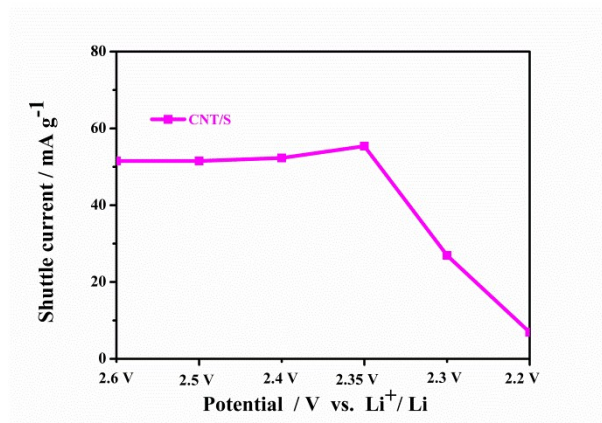

**Figure S5** The shuttling current of CNT/S/Li coin cells

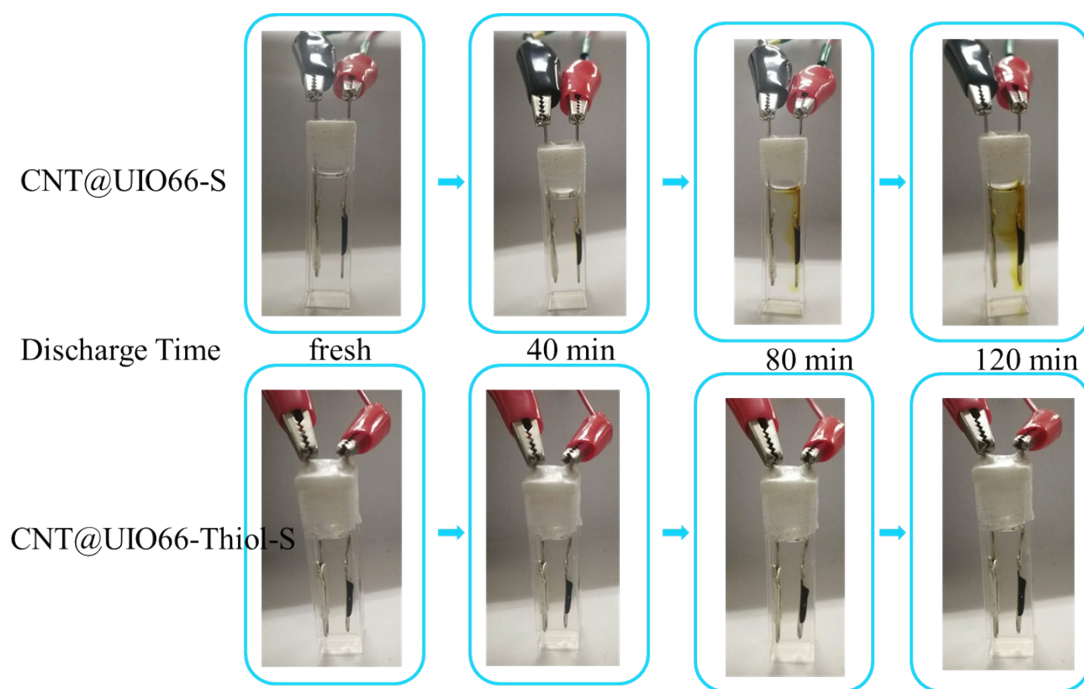

**Figure S6.** Photographs displaying the dissolution of polysulfide intermediates into electrolyte during discharge at 0.5C for CNT@UIO66-S cathode and CNT@UIO66-NH<sub>2</sub>/S cathode



**Table S1** Elemental analyses data of CNT@UIO66-NH<sub>2</sub>, CNT@UIO66-SH and CNT@UIO66-S

| Sample                    | C wt.% | N wt.% | S wt.% |
|---------------------------|--------|--------|--------|
| CNT@UIO66-NH <sub>2</sub> | 45.5   | 4.3    | 0.1    |
| CNT@UIO66-SH              | 41.9   | 3.2    | 7.5    |
| CNT@UIO66-S               | 19.3   | 1.4    | 53.6   |

**Table S2** Comparison of the cycle performance of the reported electrodes material by simply blending sulfur with MOF. (1C=1675 mA·g<sup>-1</sup>)

| <b>Cathode materials</b>  | <b>Discharge current</b> | <b>Maximum Capacity (mAh g<sup>-1</sup>)</b> | <b>Capacity retention ( Cycle Numbers )</b> | <b>Capacity fading rate (% per cycles)</b> | <b>Reference</b> |
|---------------------------|--------------------------|----------------------------------------------|---------------------------------------------|--------------------------------------------|------------------|
| <b>CNT@UIO66-S</b>        | 1 C                      | 660                                          | 92.12%<br>(550)                             | 0.017                                      | This work        |
|                           | 2 C                      | 519                                          | 80.19%<br>(900)                             | 0.022                                      |                  |
| <b>S/D-CNTs@ZIF-8</b>     | 1C                       | 550                                          | 85%<br>(300)                                | 0.05                                       | 1                |
| <b>NCCNT-Co-S</b>         | 1C                       | 986                                          | 88%<br>(500)                                | 0.024                                      | 2                |
| <b>S/MOF-74-Ni/CNT</b>    | 2C                       | 773                                          | 65.1%<br>(400)                              | 0.087                                      | 3                |
| <b>CNT@CoNC/S</b>         | 0.2C                     | 1174.6                                       | 79.8%<br>(500)                              | 0.0403                                     | 4                |
| <b>S/CN-5@NSHPC</b>       | 1C                       | 615                                          | 72.3%<br>(500)                              | 0.048                                      | 5                |
| <b>CNT-GC@NC/S</b>        | 1C                       | 863                                          | 67.2%<br>(800)                              | 0.041                                      | 6                |
| <b>S/ZIF-8</b>            | 0.5C                     | 738                                          | 75%<br>(300)                                | 0.083                                      | 7                |
| <b>S@Co-N-GC (ZIF-67)</b> | 1C                       | 1150                                         | 54%<br>(500)                                | 0.092                                      | 8                |

## References

1. H. Zhang, W. Zhao, Y. Wu, Y. Wang, M. Zou and A. Cao, *Journal of Materials Chemistry A*, 2019, **7**, 9195-9201.
2. H. Lu, C. Zhang, Y. Zhang, Y. Huang, M. Liu and T. Liu, *Nano Research*, 2018, **11**, 6155-6166.
3. G. Xu, Y. Zuo and B. Huang, *Journal of Electroanalytical Chemistry*, 2018, **830-831**, 43-49.
4. J. Zhao, C. Liu, H. Deng, S. Tang, C. Liu, S. Chen, J. Guo, Q. Lan, Y. Li, Y. Liu, M. Ye, H. Liu, J. Liang and Y.-C. Cao, *Materials Today Energy*, 2018, **8**, 134-142.
5. H. Zhang, Z. Zhao, Y.-N. Hou, Y. Tang, Y. Dong, S. Wang, X. Hu, Z. Zhang, X. Wang and J. Qiu, *Journal of Materials Chemistry A*, 2018, **6**, 7133-7141.
6. H. Yu, B. Zhang, F. Sun, G. Jiang, N. Zheng, C. Xu and Y. Li, *Applied Surface Science*, 2018, **450**, 364-371.
7. J. Zhou, X. Yu, X. Fan, X. Wang, H. Li, Y. Zhang, W. Li, J. Zheng, B. Wang and X. Li, *Journal of Materials Chemistry A*, 2015, **3**, 8272-8275.
8. Y.-J. Li, J.-M. Fan, M.-S. Zheng and Q.-F. Dong, *Energy & Environmental Science*, 2016, **9**, 1998-2004.
